# Supplementary material for: Tracking Fungal Growth: Establishment of Arp1 as a Marker for Polarity Establishment and Active Hyphal Growth in Filamentous Ascomycetes
Source: MDPI journal article supplement (doi:10.3390/jof7070580), 2021-07-20
Supplement: s1 [file s1]

# Tracking fungal growth: Establishment of dynactin Arp1 as a marker for polarity establishment and active hyphal growth in filamentous ascomycetes

Anika Groth <sup>1</sup>, Carolin Schunke <sup>1,2</sup>, Eva Johanna Reschka <sup>1</sup>, Stefanie Pöggeler <sup>1,\*</sup> and Daniela Elisabeth Nordzike <sup>1,\*</sup>

<sup>1</sup>Georg-August-University of Göttingen, Institute of Microbiology and Genetics, Department of Genetics of Eukaryotic Microorganisms, Grisebachstr. 8, 37077 Göttingen, Germany; dnordzi@gwdg.de

<sup>2</sup>current address: Biochemistry Center, Heidelberg University, Heidelberg, Germany

\*Correspondence: spoegge@gwdg.de (S.P.), dnordzi@gwdg.de (D.E.N.)

## Figures

|          |                                                             |     |
|----------|-------------------------------------------------------------|-----|
| Sc_ARP1  | MDQLSDSYALYNQPVVIDNGSGIIK-----AGFSGEERPKALEYCLV             | 42  |
| Sp_ARP1  | ---MTVTEIFDNQPICIDNGSGFIK-----AGFAGDDIPKCLFPTCV             | 39  |
| Ca_ARP1  | -----MAEILYNQPVVIDNGSGNLK-----AGFAGEDKPKSYASAI              | 37  |
| Pc_ARP1  | ---MEFNDVLTNQPICIDNGSGVIK-----AGFAGEDQPKSFFPSYV             | 39  |
| Um_ARP1  | MAGNEFDDVLTNQPVIDNGSGSIK-----AGFAGQDAPKCFPSFV               | 42  |
| Ro_ARP1  | -MNTEFDDVLTNQPVIDNGSGVIK-----AGFAGEEQPKCFPSMV               | 41  |
| Ml_ARP1  | -MNSEFDDVLTNQPVIDNGSGVIK-----AGFAGEEQPKCFPSMV               | 41  |
| Cn_ARP1  | -MATEFDDVLTNQPVIDNGSGNIK-----AGFAGEEQPSCYIPSFV              | 41  |
| Cc_ARP1  | -MSAEFDDVLTNQPVIDNVGPLSPGTPSPSSTGIWNHKGFCRSRSSQMLLP---      | 56  |
| Sco_ARP1 | -MSAEFDDVLTNQPVIDNGSGTIK-----AGFAGQDHPKCFPSFV               | 41  |
| An_ARP1  | -----MTEATLHNAPIVIDNGSGTIR-----AGFAGEEIPSCYFPSFV            | 38  |
| Mo_ARP1  | -----MAQLLHNSPIVIDNGSGTIR-----AGFAGEDLPKCFPSFV              | 37  |
| Sm_ARP1  | -----MTDSLHNAPIVLDNGSGTIR-----AGFAGDDVPKCHFPSFV             | 37  |
| Nc_ARP1  | -----MTDSLHNAPIVLDNGSGTIR-----AGFAGDDVPKCHFPSFV             | 37  |
| Cg_ARP1  | -----MTDSLHNAPIVLDNGSGTIR-----AGFAGDDLKCYFPSFV              | 37  |
| Fo_ARP1  | -----MADSLHNAPIVLDNGSGTIR-----AGFAGDDLKCYFPSWV              | 37  |
|          | : * *: : ** . . ** . .                                      |     |
| Sc_ARP1  | GNTKYDKVMLEGL-----QGDTFIGNNA-QKLRLGLLKLRYPIKHGVVEDWDSMELI   | 92  |
| Sp_ARP1  | GRIKHERVMPSSI-----QKDMFVGSEA-QNLRGLLKIQRPIERGIIQNWSDMEEI    | 89  |
| Ca_ARP1  | GRPKYQKIMAAGSTSLSEQQSHDQLFIGNSA-QDNRGLLKLSPYIEHGIVNNWSDMEKL | 96  |
| Pc_ARP1  | GRPKHLKIMAGAI-----EGDIFIGNKA-QELRGLLKIYPIEHGIVVDWDDMERI     | 89  |
| Um_ARP1  | GRPKHPRVMAGAI-----EGDLFIGRKA-QELRGLLKIYPMEHGIVTDWDDMERI     | 92  |
| Ro_ARP1  | GRPKHVRIMAGAV-----EGDNFIGRKA-QELRGLLKIYPIEHGIVTDWDDMERI     | 91  |
| Ml_ARP1  | GRPKHVRIMAGAV-----EGDNFIGRKA-QELRGLLKIYPIEHGIVTDWDDMERI     | 91  |
| Cn_ARP1  | GRPKHPRVMAGAI-----QDNLFIGNRA-QEFRGLLKIYPMEHGVVMDWDDMERI     | 91  |
| Cc_ARP1  | --LFHERVMAGAL-----EGDVFIGRKA-QEFRGLLKIYPMEHGIVTNWDDMERI     | 104 |
| Sco_ARP1 | GRPKHVRVMAGAL-----EGDVFIGKRA-QEFRGLLKIYPMEHGIVTDWDDMERI     | 91  |
| An_ARP1  | GRPKHPRVMAGGL-----EGDVFIGQRA-QELRGLMKIRYPLEHGIVTDWDDMEKI    | 88  |
| Mo_ARP1  | GRPKHLKVLALAGAL-----EGDVFIGEKAATELRGLLKIYPLEHGIVTDWDDMEKI   | 88  |
| Sm_ARP1  | GRPKHLRVLALAGAL-----EGEVFIGQKAATELRGLLKIYPLEHGIVTDWDDMEKI   | 88  |
| Nc_ARP1  | GRPKHLRVLALAGAL-----EGEVFIGQKAASELRGLLKIYPLEHGIVTDWDDMEKI   | 88  |
| Cg_ARP1  | GRPKHLRVLALAGAL-----EGEVFIGQKAATELRGLLKIYPLEHGIVTDWDDMEKI   | 88  |
| Fo_ARP1  | GRPKHLRVLALAGAL-----EGEVFIGQKASTELRGLLKIYPLEHGIVTDWDDMERI   | 88  |
|          | : :: . . : * : * . *** : * : : : : * : : : : :              |     |

|          |                                                                |     |
|----------|----------------------------------------------------------------|-----|
| Sc_ARP1  | WSYVLNEVLQLQNIGEHPLLLITEAPMNP LKNREQMAQVLFETFDVSALYVSNPAVLSLYA | 152 |
| Sp_ARP1  | WSYIYSDQQLNTLPEEHPLLLTEPPLANIRNKEKIAEYFYETLNVFALSFSLQPV LALYA  | 149 |
| Ca_ARP1  | WYHTYTQ-ELKTQSEDHPLLLITEAPLNPRSNRNKMCQILFENFNIPCIYTSIQAVLSLYA  | 155 |
| Pc_ARP1  | WQFIYTE-ELKTVSEEHPVLLTEAPLNPRTNRDQAAQVFFETFNVPALFTSIQAVLSLYA   | 148 |
| Um_ARP1  | WNHVYSD-ELETLSEEHPVLLTEAPLNPRSNRDMAAQIFFETFNVPALFTSIQAVLSLYS   | 151 |
| Ro_ARP1  | WQYIYTD-ELKTLSEEHPVLLTEAPLNPRANRD TAAQIFFETFNVPALFTSIQAVLSLYS  | 150 |
| Ml_ARP1  | WQYIYTD-ELKTLSEEHPVLLTEAPLNPRANRD TAAQIFFETFNVPALFTSIQAVLSLYS  | 150 |
| Cn_ARP1  | WGWWYGE-GLKALSEEHPVLLTEAPLNPRQN RDIAAQIFFETFNVPAFFTSVQAVLSLYS  | 150 |
| Cc_ARP1  | WNWVYAE-ELGTLSEEHPVLLTEAPLNPR TNRDVAAQIFFDTFNVPALFTSVQAVLSLYS  | 163 |
| Sco_ARP1 | WSWVYAE-ELGTLSEEHPVLLTEAPLNPR SNRDIAAQIFFDTFNVPAMFTSVQAVLSLYS  | 150 |
| An_ARP1  | WHYVYEN-ELKTLPEEHPVLLTEPPLNPRKN RDIAAQIMFETFNVPALYTSIQAVLSLYA  | 147 |
| Mo_ARP1  | WGYVYEE-GLKVLSEEHPVLLTEPPLNPRAN RD TAAQILFETFNVPALYTSIQAVLSLYA | 147 |
| Sm_ARP1  | WAYVYDE-GLKTLSEEHPVLLTEPPLNPRAN RD TAAQILFETFNVPALYTSIQAVLSLYA | 147 |
| Nc_ARP1  | WAYVYDE-GLKTLSEEHPVLLTEPPLNPRAN RD TAAQILFETFNVPALYTSIQAVLSLYA | 147 |
| Cg_ARP1  | WEYVYGE-GLKTLSEEHPVLLTEPPLNPR SNRD TAAQILFETFNVPALYTSIQAVLSLYA | 147 |
| Fo_ARP1  | WEYVYGE-GLKTLSEEHPVLLTEPPLNPR SNRD TAAQILFETFNVPALHTSIQAVLSLYA | 147 |
|          | * : : : : : : : : : : : : : : *                                |     |

|          |                                                                 |     |
|----------|-----------------------------------------------------------------|-----|
| Sc_ARP1  | SGRTTGCVVDCGEGYCVSTVPIYDGFALPASM MRMDIGG-----ADITEQLQFQLRKS     | 204 |
| Sp_ARP1  | SARTTGIVLECGDGLTHSVPIYDGF SIPS AIQQEEIGG-----RDVTDYLQLQLR-K     | 200 |
| Ca_ARP1  | SGRTTGVVIDSGDGVTHVPVYEGFALPPS IKRMDIAG-----RDITESLAFNIRRM       | 207 |
| Pc_ARP1  | SGRTTGVVLDSDGDGVTHAVPIYEGFAMP SAIRRIDIAG-----RDVTEYLQLLLR-K     | 199 |
| Um_ARP1  | SGRTTGIVLDSDGDGVTHAVPVYEGFSMP NAIRRVDVAG-----RDVTENLQTHLR-K     | 202 |
| Ro_ARP1  | SGRTTGIVLDSDGDGVTHAVPVYEGFAIP HAIRRVDIAG-----RDVTEYLQLLLR-R     | 201 |
| Ml_ARP1  | SGRTTGIVLDSDGDGVTHAVPVYEGFAIP HAIRRVDVAG-----RDVTEYLQLLLR-K     | 201 |
| Cn_ARP1  | SGRTTGIVLDSDGDGVTHAVPVFEGFSMP HAVRRIDLAG-----RDITDHLQLLLR-K     | 201 |
| Cc_ARP1  | SGRTTGIVLDSDGDGVTHAVPVYEGFSMP HAIRRVDVAGSSEHGPF SRDVTDHLQLLLR-K | 222 |
| Sco_ARP1 | SGRTTGIVLDSDGDGVTHAVPVFEGFSMP HAIRRVDVAG-----RDVTDHLQLLLR-K     | 201 |
| An_ARP1  | SGRTTGVVLDSDGDGVSHAVPVYEGFAIP NSIRRIDVAG-----RDVTEQLQLLLR-K     | 198 |
| Mo_ARP1  | SGRTTGIVLDSDGDGVSHAVPVYEGFAIT NSIQRIDVAG-----RDVTEHLQTLLR-K     | 198 |
| Sm_ARP1  | SGRTTGVVLDSDGDGVSHAVPVYQGFTVP NSIRRIDVAG-----RDVTEYLQTLLR-K     | 198 |
| Nc_ARP1  | SGRTTGVVLDSDGDGVSHAVPVYQGFTVP NSIRRIDVAG-----RDVTEYLQTLLR-K     | 198 |
| Cg_ARP1  | SGRTTGIVLDSDGDGVSHAVPVYEGFAMP SSIRRIDVAG-----RDVTEYMQMLLR-K     | 198 |
| Fo_ARP1  | SGRTTGIVLDSDGDGVSHAVPVYEGFAMP SSIRRIDVAG-----RDVTEYMQTLLR-K     | 198 |
|          | *.**** *: : : : * : : : : : : : : : : * : : : *                 |     |

|          |                                                                |     |
|----------|----------------------------------------------------------------|-----|
| Sc_ARP1  | AGVSLFSSSEREIVRTMKEKVCYLAKNIKKEE KYLQGTQ-----DLISTFKLPDGRCI    | 258 |
| Sp_ARP1  | SGHELVSAAEKEIVREIKEKCCYVASDFR SEIESWTEHK-----PQIHTYQLPDNQTI    | 253 |
| Ca_ARP1  | TGVALQSSSELEIVRLIKEQNCFISKDPVR DEKKYKGSHYSRNNPNNELMSTYKLPDGHEI | 267 |
| Pc_ARP1  | SGTIFHTSAEKEIVRIIKEKCSYVTLDP RKEEKEWINASISGGKDYTKEEEFKLPDGNVL  | 259 |
| Um_ARP1  | AGYHLHTSAEKELVRIIKEKTCYVALNP TKEEKDTP-----QHEEFKLPDGNTI        | 251 |
| Ro_ARP1  | SGYNFHTTAEKEVVRIIKEKTCYIALNPV KEEKETS-----GKVDDFMLPDGNII       | 251 |
| Ml_ARP1  | SGYNFHTTAEKEVVRIIKEKTCYIALNP KEEKETS-----GKVDDFMLPDGNII        | 251 |
| Cn_ARP1  | AGHNLHTSAEKEVVRTIKEKTCYIALNPV KEEKDQG-----GAWEERFRLPDGKVI      | 251 |
| Cc_ARP1  | AGHHLHTSAEREVVRTIKEKCCYVALNP IKEEKDSL-----GRTEEFRLPDGNIV       | 272 |
| Sco_ARP1 | AGHHLHTSAEREVVRTIKEKCCYIPISPA KEKDTN-----GRTEDFRLPDGNVV        | 251 |
| An_ARP1  | TGHVLTHTSAEKEVVRMIKEKVCSVSLDP KREEKEWMNSYKSES----KHADYVLPDGHKI | 254 |
| Mo_ARP1  | SGYVFHTSAEKEVVRLIKEATSYVAHD PKKEEKEWAGAKLDPSK---MMSDYTLPDGNKI  | 255 |
| Sm_ARP1  | SGYVFHTSAEKEVVRLIKESVTYVAHD PRKEEKEWAAAKMDPAK---I-AEYVLPDGNKL  | 254 |
| Nc_ARP1  | SGYVFHTSAEKEVVRLIKESVTYVAHD PRKEEKEWAAAKMDPAK---I-AEYVLPDGNKL  | 254 |
| Cg_ARP1  | SGYVFHTSAEKEVVRLIKESVTYVAHD PRKEEKEWANRT-DPTK---G-VEYILPDGHKL  | 253 |
| Fo_ARP1  | SGYVFHTSAEKEVVRLIKESVSYVAHD PRKEERDWWGVKPNESK---F-AEYVLPDGFKL  | 254 |
|          | : * : : : * * : * * : * : : : : : : : : : : * * * . :          |     |

|          |                                                                 |     |
|----------|-----------------------------------------------------------------|-----|
| Sc_ARP1  | EVGNDRYRAPEILFSPQIIGLGYDGLSDM CMQSIWKVDLDRKPLLSIIILSGGTTLTKG    | 318 |
| Sp_ARP1  | TLGTECFSAPEVLFPNPEMMGSEASGLHI QLFKSILLSDIDLRLSTLYSNIVLSGGSTLLRG | 313 |
| Ca_ARP1  | QLGVERFRATEILFNPQLIGHESPGIHE LTSIAIAKTDLRLSTLYQNIILSGGNTLLKN    | 327 |
| Pc_ARP1  | RLGAERFRAPEILFDPEIIGSEYSGIHQ VVVD AISRVLDLDRKSIFGNIVLSGGSTLTRG  | 319 |
| Um_ARP1  | RLGAERFRAPEILFNPELIGQEFPGIHQ VIVDS INRTDLDLRKNLFSNIVLSGGSTLTKG  | 311 |
| Ro_ARP1  | KLGAERFRAPEILFQPELIGEEYPGIHQ VIVDC ISRADLDRKSISYSNVLSGGSTLCKG   | 311 |
| Ml_ARP1  | KLGAERFRAPEILFQPELIGEEYPGIHQ VIVDC IGRADLDRKSISYSNVLSGGSTLCKG   | 311 |
| Cn_ARP1  | QLGTERFLAPEILFNPPELVGQEPGVHQ VIVDS INRTDLDLRKSIFSNIVLSGGSTLCTG  | 311 |
| Cc_ARP1  | QLGAERFRAPEILFDPELIGQEYAGVHQ VVVD SINRVLDLDRKSIFSNIVLSGGSTLCRG  | 332 |
| Sco_ARP1 | QLGPERFRAPEILFNPPEIIGQEYAGVHQ VIVDAITRVLDLDRKSISYSNIVLSGGSTLTKG | 311 |
| An_ARP1  | KIGQERFRAPEILFDPELIGLEYPGVHQ IVD AII RTDLDLRKSILYNIVLSGGSTLCKN  | 314 |
| Mo_ARP1  | KLGAERFRAPEILFDPEIIGLEYPGVHQ MVINAIGKTDLDRKSISYSNIVLSGGSTLTKG   | 315 |
| Sm_ARP1  | KIGAERFRAPEILFDPEIIGLEYPGVHQ IVD SINRTDLDLRDLYSNIVLSGGSTLTKG    | 314 |
| Nc_ARP1  | KIGAERFRAPEILFDPEIIGLEYPGVHQ IVD SINRTDLDLRDLYSNIVLSGGSTLTKG    | 314 |
| Cg_ARP1  | KIGAERFRAPEILFDPEIIGLEYPGVHQ IVD AINRTDLDLRKSISYSNIVLSGGSTLTRG  | 313 |
| Fo_ARP1  | KIGAERFRAPEILFDPEIIGLEYPGVHQ IVD AINRTDLDLRKSISYSNIVLSGGSTLTKG  | 314 |
|          | : * : : * * : * * : * : : * * : * * : * : : * * : * * : *       |     |

|                     |                                                              |                      |
|---------------------|--------------------------------------------------------------|----------------------|
| Sc_ARP1             | FGDRMLWDLEALT-----KGTSKIKI IAPSERKYTTWIGGSILT                | 357                  |
| Sp_ARP1             | FGERFISELRAIS-----GKKNQVKIYASPERMHNWLGGSSILA                 | 352                  |
| Ca_ARP1             | FGDRMLKEIKDLQQPLQEDQKMSIWNKNVQNDVYNTKMKVKIYAPPERKYSTWIGGSILA | 387                  |
| Pc_ARP1             | FGDRLLSEIRRLA-----VKDVKIKI FAPPERKYSTWIGGSILA                | 358                  |
| Um_ARP1             | FGDRMLAEVKRLA-----VREMKIKI FAPPERKYATWIGGSILA                | 350                  |
| Ro_ARP1             | FGERLLSEIKRLA-----LKDIKIKIYAPPERKYSTWIGGSILA                 | 350                  |
| MI_Arp1             | FGERLLSEIKRLA-----LKDIKIKIYAPPERKYSTWIGGSILA                 | 350                  |
| Cn_ARP1             | FGDRLLNEVKKLA-----VKDVKLKIYAPPERKYSTWIGGSILA                 | 350                  |
| Cc_ARP1             | FGDRLLNEVKKLA-----LKDIKIKIYAPPERKYSTWIGGSILA                 | 371                  |
| Sco_ARP1            | FGDRLLNEVKKLA-----LKDIKIKIYAPPERKYSTWIGGSILA                 | 350                  |
| An_ARP1             | FPDRMLREIKRLA-----VEDMKIRISAPAERKYTTWIGGGILA                 | 353                  |
| Mo_ARP1             | FGDRLLTEVQKLA-----VRDMRIKIFAPPERKYSTWIGGSILA                 | 354                  |
| Sm_ARP1             | FGDRLLTEVQKLA-----VKDMRIKIFAPPERKYSTWIGGSILA                 | 353                  |
| Nc_ARP1             | FGDRLLTEVQKLA-----VKDMRIKIFAPPERKYSTWIGGSILA                 | 353                  |
| Cg_ARP1             | FGDRLLTELQRLA-----VKDMRIKIFAPPERKYSTWIGGSILA                 | 352                  |
| Fo_ARP1             | FGDRLLTELQKLA-----VKDMRIKIFAPPERKYSTWIGGSILA                 | 353                  |
| * :*:: :. :         |                                                              | :::* * ** : :*:**.*: |
|                     |                                                              |                      |
| Sc_ARP1             | GLSTFQRLWTKKSDWLEDSTRVYSNLM*                                 | 384                  |
| Sp_ARP1             | SLSTFRRLITSEEYKNDQNVIFRRRF-                                  | 379                  |
| Ca_ARP1             | GLSTFKKMWVTSEEYHENPDIVHVKCM-                                 | 414                  |
| Pc_ARP1             | SLSTFRKMWVSAAEYQEDPDI IHRKSI-                                | 385                  |
| Um_ARP1             | GLSTFKRMWVSAAEYNEDPDVIHKKTF-                                 | 377                  |
| Ro_ARP1             | SLSTFKKMWVSAAEYQEDPDI IHHKTF-                                | 377                  |
| MI_Arp1             | SLSTFKKMWVSAAEYQEDPDI IHHKTF-                                | 377                  |
| Cn_ARP1             | GLSTFKKMWVSAD EYKEDPDI IHHKAF-                               | 377                  |
| Cc_ARP1             | GLSTFKKMWVSAAEYQEDPDI IHHKFGF                                | 399                  |
| Sco_ARP1            | GLSTFKKMWVSAAEYQEDPDI IHHKTFG                                | 378                  |
| An_ARP1             | GLSTFRKMWVSAD EWHEDPEI IHRKFA-                               | 380                  |
| Mo_ARP1             | GLSTFRKMWVSMD DWHENPDI IHTKFN-                               | 381                  |
| Sm_ARP1             | GLSTFRKMWVSID DWHENPDI IHTKFT*                               | 380                  |
| Nc_ARP1             | GLSTFRKMWVSID DWHENPDI IHTKFT-                               | 380                  |
| Cg_ARP1             | GLSTFRKMWVSID DWHENPEI IHTKLT-                               | 379                  |
| Fo_ARP1             | GLSTFRKMWVSID DWHENPDI IHTKFT-                               | 380                  |
| .****::: . ::: :. . |                                                              |                      |

**Figure S1.** CLUSTAL Omega (1.2.4) multiple sequence alignment of fungal ARP1 orthologs. Accession numbers are indicated in Figure S2 (phylogenetic tree). Abbreviations: Sm, *Sordaria macrospora*; Nc, *Neurospora crassa*; Cg, *Colletotrichum graminicola*; Fo, *Fusarium oxysporum* f. sp. *Lycopersici*; Mo, *Magnaporthe oryzae*; An, *Aspergillus nidulans*; Sc, *Saccharomyces cerevisiae*; Ca, *Candida albicans*; Pc, *Pneumocystis carinii*; Sp, *Schizosaccharomyces pombe*; Cn, *Cryptococcus neoformans* var. *grubii*; Um, *Ustilago maydis*; Cc, *Coprinopsis cinerea*; Sco, *Schizophyllum commune*; Ro, *Rhizopus oryzae*; MI, *Mucor lusitanicus*. . In the conservation line, asterisk indicates positions, which have a single, fully conserved residue; colon indicates conservation between groups of strongly similar properties; and period indicates conservation between groups of weakly similar properties.

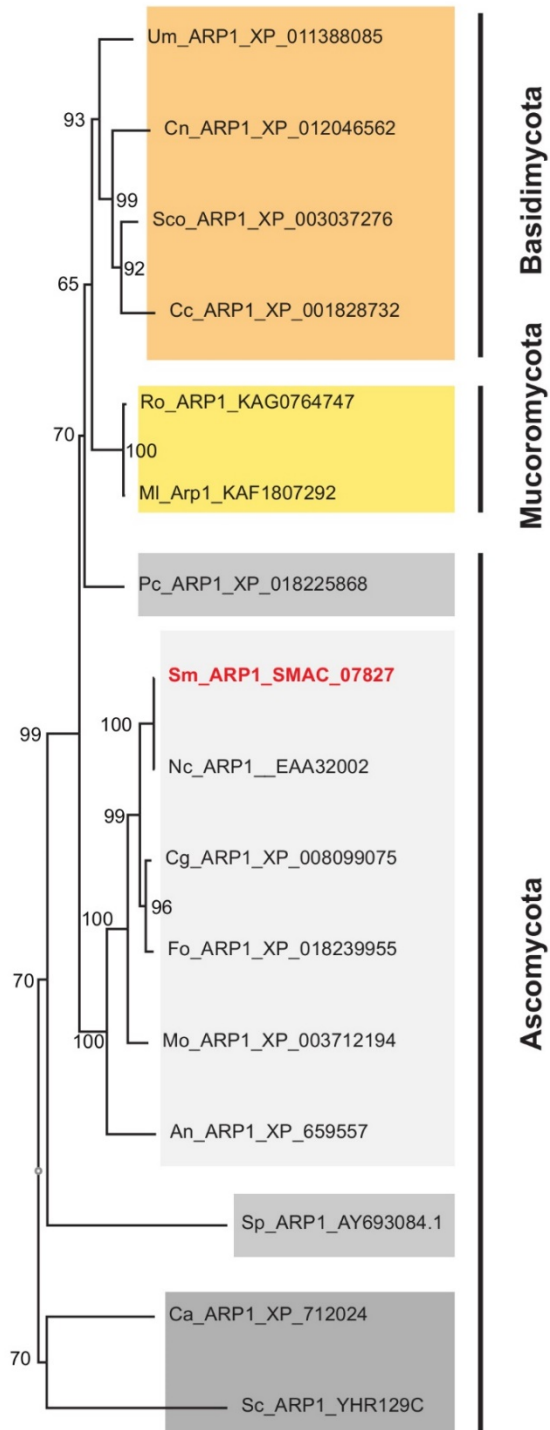

**Figure S2.** Phylogenetic tree of Arp1 orthologs from fungi. The phylogenetic tree of Arp1 was generated with the Neighbor Joining method. Orthologs were identified with BLASTP search using amino acid sequences of the *Sordaria macrospora* SmARP1 (SMAC\_07827) indicated in red. The multiple sequence alignment and phylogenetic analysis was performed with MAFFT version 7 [1]. Bootstrap values based on 1000 replications are rounded to whole numbers and are indicated at the nodes. Accession numbers are indicated. Abbreviations: Sm, *Sordaria macrospora*; Nc, *Neurospora crassa*; Cg, *Colletotrichum graminicola*; Fo, *Fusarium oxysporum* f. sp. *Lycopersici*; Mo, *Magnaporthe oryzae*; An, *Aspergillus nidulans*; Sc, *Saccharomyces cerevisiae*; Ca, *Candida albicans*; Pc, *Pneumocystis carinii*, Sp, *Schizosaccharomyces pombe*; Cn, *Cryptococcus neoformans* var. *grubii*; Um, *Ustilago maydis*; Cc, *Coprinopsis cinerea*; Sco, *Schizophyllum commune*; Ro, *Rhizopus oryzae*; MI, *Mucor lusitanicus*.

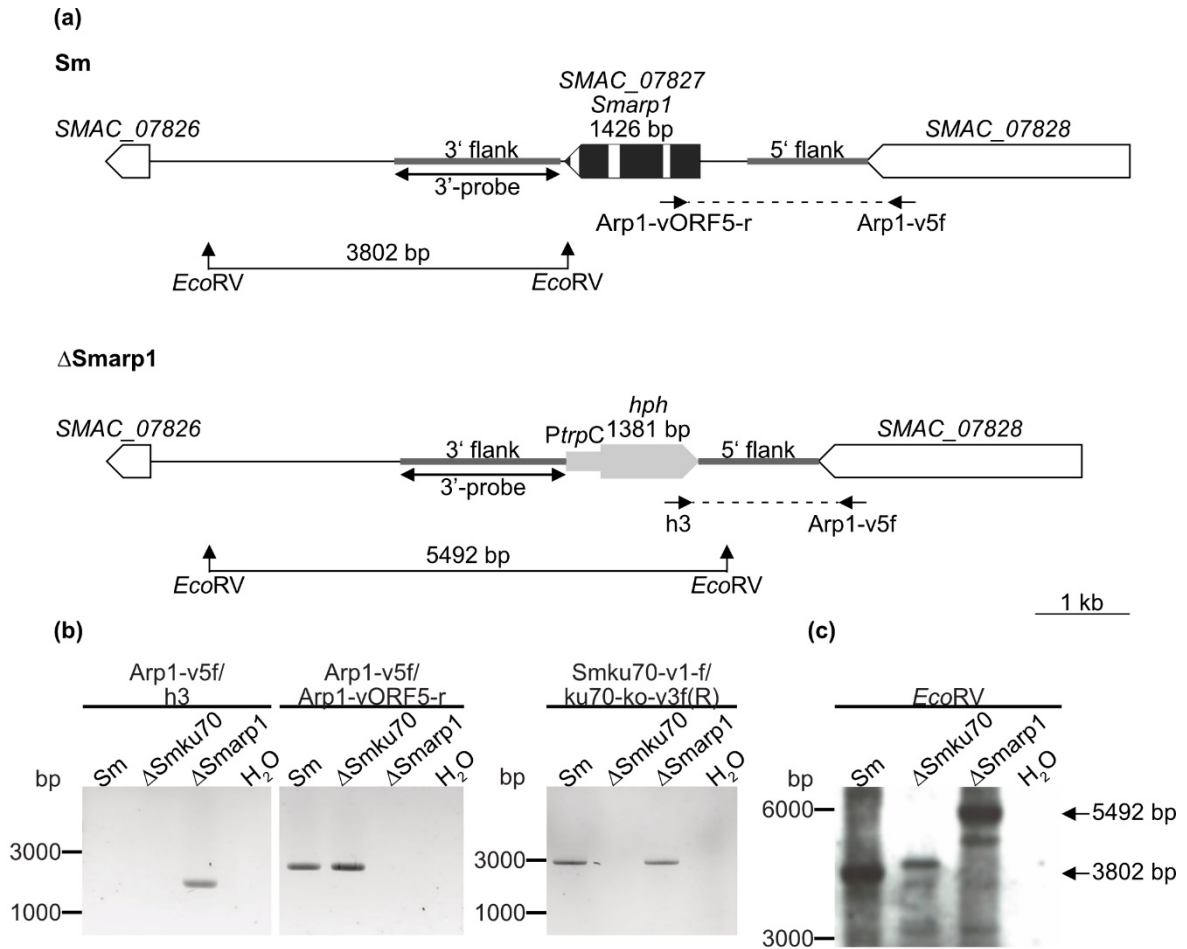

**Figure S3.** Verification of *S. macrospora Smarp1* deletion by PCR and Southern blot analysis. (a) Schematic representation of the *Smarp1* ORF SMAC\_07827 (black arrow) with three introns (white boxes). White arrows indicate adjacent ORFs. After Golden-Gate cloning, the *hph* cassette replaced the *Smarp1* ORF. Primer binding sites for the verification of *hph* cassette integration (Arp1-v5f/ h3), presence of *Smarp1* gene (Arp1-v5f/ Arp1-vORF5-r), and probe amplification for Southern hybridization are indicated. Regions of probe binding and size of the expected DNA fragments generated by *EcoRV* hydrolyzation for Sm and Δ*Smarp1* are plotted. (b) PCR verification of the integration of the *hph* cassette into the *Smarp1* locus and the presence of *Smku70* gene in the *Smarp1* deletion mutant. (c) Confirmation of *Smarp1* deletion by Southern Blot analysis. Genomic DNA was hydrolyzed with *EcoRV*. Signals detected correspond to the fragment size of 3802 bp for Sm and Δ*Smku70* strains and 5492 bp for the Δ*Smarp1* strain (indicated by arrows).

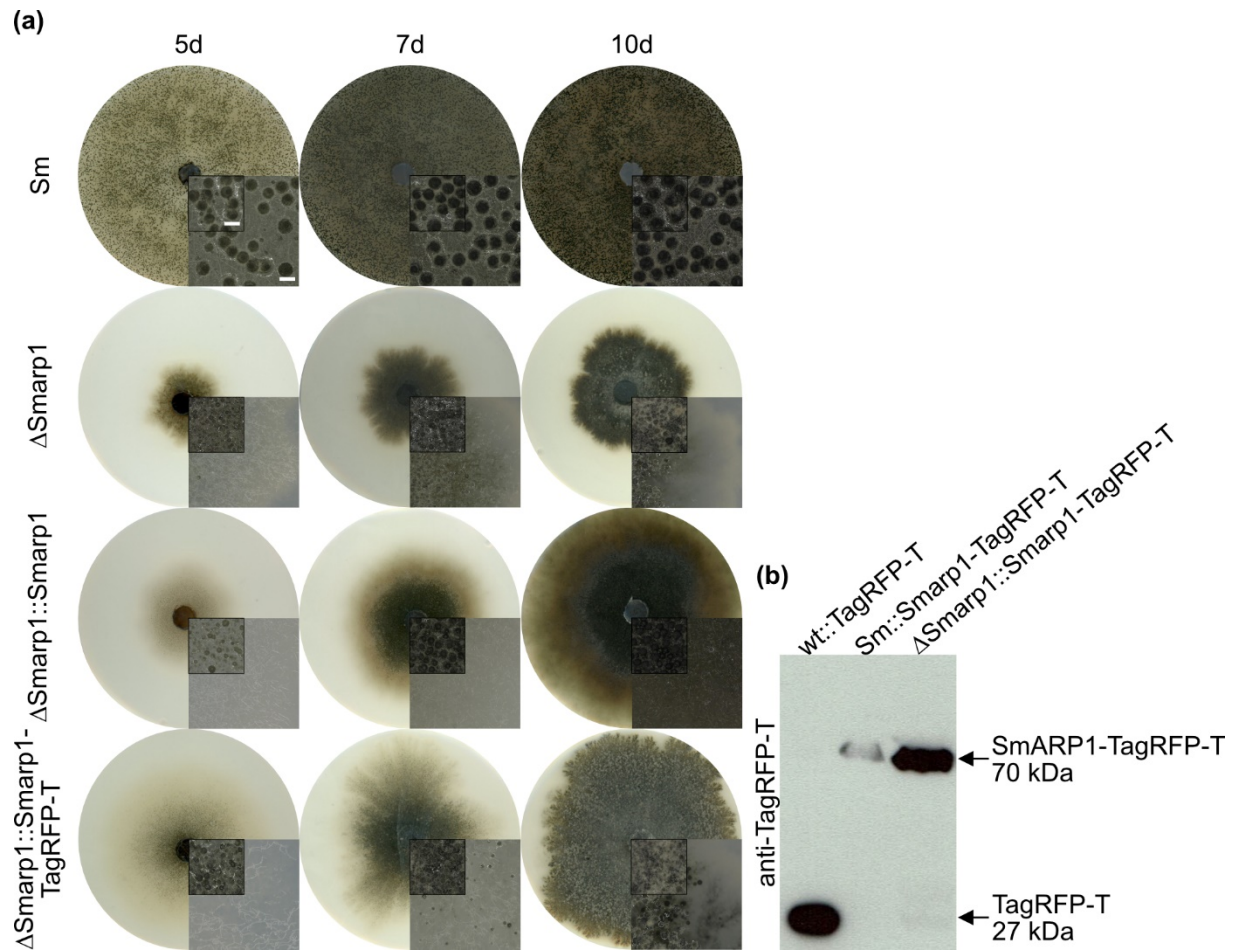

**Figure S4.** Growth of *S. macrospora*  $\Delta$ Smarp1 and complementing strains and corresponding expression controls via Western blot analysis. (a) Phenotypic analysis of *S. macrospora* wt (Sm),  $\Delta$ Smarp1 and the complementation strains  $\Delta$ Smarp1::Smarp1 and  $\Delta$ Smarp1::Smarp1-TagRFP-T. Strains were grown on SWG medium at 27 °C. Pictures of the agar plates and microscopic images were taken after indicated days, scale bar = 0.5 mm. (b) Western blot analysis of *S. macrospora* wt (Sm) and  $\Delta$ Smarp1 ectopically expressing SmARP1-TagRFP-T, wt::TagRFP-T served as control. Expected protein sizes are indicated.

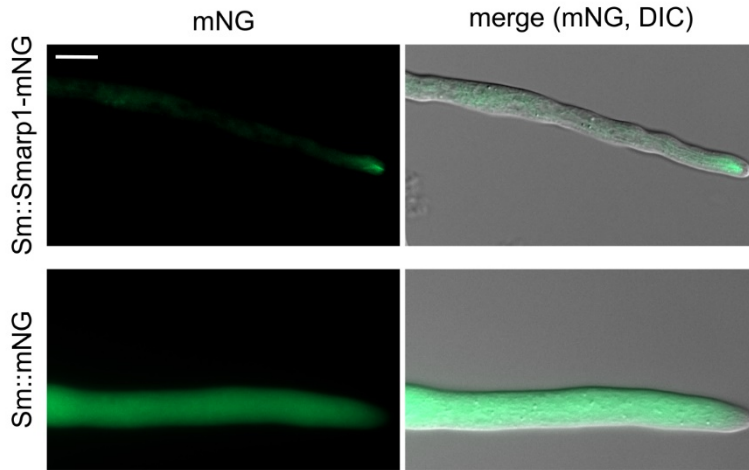

**Figure S5.** Localization of SmArp1-mNG and free mNG in *S. macrospora*. Heterologous expression of pSmarp1-mNG in *S. macrospora* wildtype hyphae. Recording of hyphae from growing strains on BMM-covered glass slides after incubation for 24 h at 27 °C. SmArp1-mNG shows comet-like localization at the hyphal tip. Expression of mNG serves as control, size bar = 10  $\mu$ m.

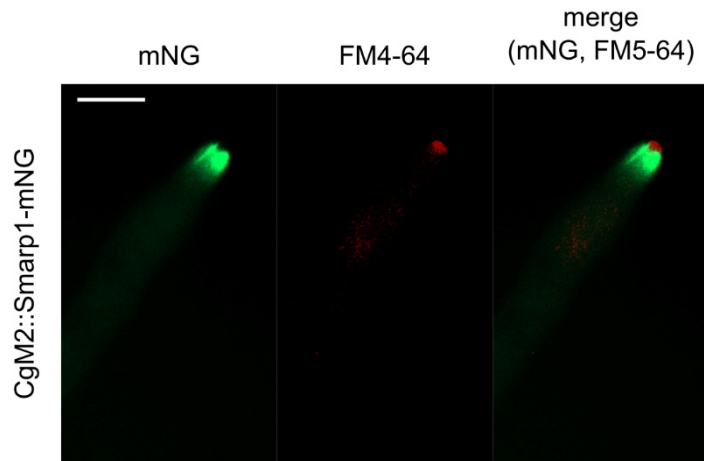

**Figure S6.** Localization of Arp1 and FM4-64 in *C. graminicola*. Heterologous expression of pSmarp1-mNG in *C. graminicola* wildtype CgM2 hyphae. Recording of hyphae from growing colonies on CM topped with cellophane after incubation for 3 d at 23 °C. Hyphae were stained with 1  $\mu$ g/ ml FM4-64 for 15 min at 37 °C, size bar = 10  $\mu$ m.

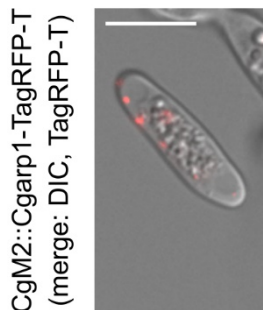

**Figure S7.** Localization of Arp1 in unpolarized, non-germinated oval conidia of *C. graminicola*. Oval conidia of CgM2 expressing endogenous Arp1-TagRFP-T were incubated to rate the chemotropic response to 50 mM glucose (glc) for 6 h, 23 °C in the 3D printed device, size bar = 10  $\mu$ m.

## Tables

**Table S1.** Oligonucleotides used in this study.

| Oligonucleotide  | Sequence (5' to 3')                                           |
|------------------|---------------------------------------------------------------|
| Arp1_promotor_f  | TAAAACGACGGCCAGTGAGCGCGCGTAATTCAAAAATGGTTCGTGC<br>ACACAAA     |
| Arp1-Neo_r       | ATGTTATCCTCCTCGCCCTTGCTCACCATTGTAAACTTCGTATGAATG<br>ATATCCGGA |
| Neo_f            | ATGGTGAGCAAGGGCGAG                                            |
| Neo_TtrpC_r      | GTTTGATGATTTTCAGTAACGTTAAGTGGACTACTTGTACAGCTCGTCC<br>ATGC     |
| TtrpC_f          | TCCACTTAACGTTACTGAAATCATCAAAC                                 |
| TtrpC_pRS_r      | GCGGATAACAATTTACACAGGAAACAGCTCGAGTGAGATGTGGA<br>GTGG          |
| Arp1_5'f         | TAAAACGACGGCCAGTGAGCGCGCGTAATTCAAAAATGGTTCGTGC<br>ACA         |
| Arp1_RFP_r       | TTAATCAGCTCTTCGCCCTTAGACACCATTGTAAACTTCGTATGAATG<br>A         |
| RFP-f            | ATGGTGTCTAAGGGCGAAGAG                                         |
| RFP-r-trpC       | TTTGATGATTTTCAGTAACGTTAAGTGGATTTACTTGTACAGCTCGTCC<br>ATGC     |
| TtrpC_F          | GATCCACTTAACGTTACTGAAATCATCAA                                 |
| pRS426GFPprev    | GCGGATAACAATTTACACAGGAAACAGCTCGAGTGAGATGTGGA<br>GTG           |
| 5'CgArp1_pJet_fw | GTTTTTCAGCAAGATATCGCCAGATTTCTAGGCCCC                          |
| CgArp1_rev       | CGTAAGCTTGGTGTGTATGATCT                                       |
| tagRFP-          | CACACCAAGCTTACGATGGTGTCTAAGGGCGAAG                            |
| T_CgArp1_fw      | TCGAGTGAGATGTGGAGTG                                           |
| TtrpC_r          | CACATCTCCACTCGATATCTCAGAAGAACTCGTCAAGAAGG                     |
| nptII_TtrpC_fw   | ATCTTCTAGAAAGATCTTGGCTGGAGCTAGTGGA                            |
| PttrpC_pJet_rev  | TCACTTCGACCCCTTACTAAC                                         |
| Arp1-v5f         | gtactcgccgatagtggaaac                                         |
| h3               | AAACACCTCGCCCTCTAATGC                                         |
| Arp1-vORF5-r     | CATCGAGGTGAGCAAGTCAATG                                        |
| Smku70-v1-f      | GCGCAACTCCAGCGTGACTG                                          |
| ku70-ko-v3f(R)   | TAGGGCGAATTGGGTACCG                                           |
| GG_KO_fw         | GGCCGCTCTAGAACTAGTG                                           |
| GG_KO_rv         | GACTGGTCTCA AGTCCCCTTGGTGCAGTACATGCTC                         |
| Arp1-ko-5f       | CAGAGGTCTCA GCAGTGGGAGGGAATGTCTTCAAGA                         |
| Arp1-ko-5r       | GTACGGTCTCG GTCATGATGATGACGACGACGA                            |
| Arp1-ko-3f       | CTCAGGTCTCC CGTAACGATATGAAGCTATGAAGAC                         |
| Arp1-ko-3r       | GTAACGCCAGGGTTTTCCCAGTCACGACG                                 |
| Arp1-nat-5f      | CCTTGGTGCAGTACATGCTC                                          |
| Arp1-nat-3r      | GCGGATAACAATTTACACAGGAAACAGC<br>ACGATATGAAGCTATGAAGA          |



**Table S2.** Plasmids used in this study.

| Name of plasmid      | Features                                                                                                                                                            | Reference               |
|----------------------|---------------------------------------------------------------------------------------------------------------------------------------------------------------------|-------------------------|
| pRS-nat              | <i>amp<sup>R</sup>, ura3, nat<sup>R</sup></i>                                                                                                                       | [2]                     |
| pRS-hyg              | <i>amp<sup>R</sup>, ura3, hyg<sup>R</sup></i>                                                                                                                       | [3]                     |
| p1783-1              | <i>amp<sup>R</sup>, ura3, hyg<sup>R</sup>, Pgpd::egfp::TtrpC</i>                                                                                                    | [4]                     |
| pxyl-mNG             | <i>amp<sup>R</sup>, ura3, nat<sup>R</sup>, Pxyl::mNG::TtrpC</i>                                                                                                     | [5]                     |
| pTagRFP-T_nat        | <i>amp<sup>R</sup>, nat<sup>R</sup>, Pccg1::TagRFP-T::TtrpC</i>                                                                                                     | [6]                     |
| pDest-Amp            | Destination vector for Golden-Gate cloning; <i>bla</i> ( <i>Bsamut</i> ), <i>lacZ</i> gene with two internal <i>BsaI</i> sites: <i>BsaI</i> (4) and <i>BsaI</i> (7) | [7]                     |
| pGG-hph              | <i>BsaI</i> (6)::trpC(p)::hph::BsaI(5) in pDrive; <i>bla</i> , <i>kan</i>                                                                                           | [7]                     |
| pArp1-KO             | <i>amp<sup>R</sup>, 5'-flanking region and 3'-flanking region of Smarp1 interrupted by hyg<sup>R</sup> in pDest-Amp</i>                                             | this study              |
| pSmarp1              | <i>amp<sup>R</sup>, ura3, nat<sup>R</sup>, Smarp1P::Smarp1::Smarp1T</i>                                                                                             | this study              |
| pSmArp1-TagRFP-T_nat | <i>amp<sup>R</sup>, ura3, nat<sup>R</sup>, Smarp1P::Smarp1::TagRFP-T::TtrpC</i>                                                                                     | this study              |
| pSmArp1-TagRFP-T_hyg | <i>amp<sup>R</sup>, ura3, hyg<sup>R</sup>, Smarp1P::Smarp1::TagRFP-T::TtrpC</i>                                                                                     | this study              |
| pSmArp1-mNG          | <i>amp<sup>R</sup>, ura3, nat<sup>R</sup>, Smarp1P::Smarp1::mNG::TtrpC</i>                                                                                          | this study              |
| pII99                | 5.3-kb <i>nptII</i> , <i>amp<sup>R</sup></i>                                                                                                                        | [8]                     |
| pJet1.2              | <i>amp<sup>R</sup></i>                                                                                                                                              | ThermoFisher Scientific |
| pCgArp1-TagRFP-T     | <i>amp<sup>R</sup>, gen<sup>R</sup>, Cgarp1P::Cgarp1::TagRFP-T::TtrpC</i>                                                                                           | this study              |
| pJet_gen             | <i>amp<sup>R</sup>, gen<sup>R</sup></i>                                                                                                                             | this study              |

*nat<sup>R</sup>*: nourseothricin resistant, *hyg<sup>R</sup>*: hygromycin resistant; *gen<sup>R</sup>*: geneticin disulphate resistant; *amp<sup>R</sup>*: ampicillin resistance; *kan<sup>R</sup>*: kanamycin resistance, *ura3*: Orotidine-5'-phosphate decarboxylase gene of *S. cerevisiae*; *Pgpd*: promoter of the glycerinaldehyd-3-phosphat-dehydrogenase-gene of *A. nidulans*; *Pccg1*: promoter of the clock controlled gene 1 of *N. crassa*; native promoters of genes are named 5'; *TtrpC*: terminator of the anthranilate synthase gene of *A. nidulans*; *mNG*: gene for green fluorescence protein monomeric NeonGreen (mNG) of *Branchiostoma lanceolatum*; *egfp*: gene for enhanced green fluorescent protein (eGFP) of *Aequorea Victoria*; *TagRFP-T*: gene for red fluorescence protein TagRFP-T of *Entacmaea quadricolor*, *nptII*: neomycin phosphotransferase gene

## Videos

**Video 1.** Dynamic localization of SmArp1-mNG to growing hyphal tips. Heterologous expression of pSmarp1-mNG in *S. macrospora* wildtype hyphae. Recording of hyphae from growing strains on BMM-covered glass slides after incubation for 24 h at 27 °C, recording interval = 5 s, size bar = 10 µm.

**Video 2.** Nuclear localization of SmArp1-mNG. Heterologous expression of pSmarp1-mNG in *S. macrospora* wildtype hyphae. Nuclei are labeled by histone 2B with tdTomato (RH2B). Recording of hyphae from growing strains on BMM-covered glass slides after incubation for 24 h at 27 °C, recording interval = 5 s, size bar = 10 µm.

**Video 3.** Dynamic localization of CgArp1-TagRFP-T in growing *C. graminicola* germlings. Heterologous expression of CgArp1-TagRFP-T in *C. graminicola* wildtype CgM2. Tracking of Arp1-TagRFP-T in germlings derived from oval conidia after 2 h of incubation on water agar, 23 °C. Recording interval = 5 min, size bar = 10 µm.

**Video 4.** Dynamic localization of SmArp1-mNG in *S. macrospora* germinating ascospores. Germinating *S. macrospora* ascospores which express Smarp1-mNG and red fluorescent histone 2B (RH2B tdTomato) on BMM-agar supplemented with agarose after incubation for 3-4 h at 27 °C, recording interval = 5 s, size bars = 10 µm.

**Video 5.** Establishment of a polar Arp1-TagRFP-T localization prior to germination of *C. graminicola*. Heterologous expression of CgArp1-TagRFP-T in *C. graminicola* wildtype CgM2. Tracking of Arp1-TagRFP-T in oval conidia after 2 h of incubation on water agar, 23 °C. Recording interval = 5 min, size bar = 10 µm.

**Video 6.** Tracking of Arp1-RFP-T during the germination of *C. graminicola* oval conidia. Heterologous expression of CgArp1-TagRFP-T in *C. graminicola* wildtype CgM2. Tracking of Arp1-TagRFP-T in oval conidia after 2 h of incubation on water agar, 23 °C. Recording interval = 5 min, size bar = 10 µm.

**Video 7.** Visualization of *C. graminicola* penetration hyphae dynamics during onion epidermis perforation. 10<sup>3</sup> oval conidia of *C. graminicola* CgM2::Cgarp1-TagRFP-T were inoculated on heat-inactivated onion epidermis overlaying water agar for 29 h at 23 °C, recording interval = 0.5 µm, size bars = 10 µm.

## References

1. Sievers, F.; Wilm, A.; Dineen, D.; Gibson, T.J.; Karplus, K.; Li, W.; Lopez, R.; McWilliam, H.; Remmert, M.; Söding, J. Fast, scalable generation of high-quality protein multiple sequence alignments using Clustal Omega. *Molecular systems biology* **2011**, *7*, 539.
2. Klix, V.; Nowrousian, M.; Ringelberg, C.; Loros, J.J.; Dunlap, J.C.; Pöggeler, S. Functional characterization of MAT1-1-specific mating-type genes in the homothallic ascomycete *Sordaria macrospora* provides new insights into essential and nonessential sexual regulators. *Eukaryot Cell* **2010**, *9*, 894-905, doi:10.1128/EC.00019-10.
3. Bloemendal, S.; Bernhards, Y.; Bartho, K.; Dettmann, A.; Voigt, O.; Teichert, I.; Seiler, S.; Wolters, D.A.; Pöggeler, S.; Kück, U. A homologue of the human STRIPAK complex controls sexual development in fungi. *Mol Microbiol* **2012**, *84*, 310-323, doi:10.1111/j.1365-2958.2012.08024.x.

4. Pöggeler, S.; Masloff, S.; Hoff, B.; Mayrhofer, S.; Kück, U. Versatile EGFP reporter plasmids for cellular localization of recombinant gene products in filamentous fungi. *Curr Genet* **2003**, *43*, 54-61, doi:10.1007/s00294-003-0370-y.
5. Werner, A.; Otte, K.L.; Stahlhut, G.; Pöggeler, S. Establishment of the monomeric yellow-green fluorescent protein mNeonGreen for life cell imaging in mycelial fungi. *AMB Express* **2020**, *10*, 222, doi:10.1186/s13568-020-01160-x.
6. Werner, A.; Otte, K.; Stahlhut, G.; Hanke, L.M.; Pöggeler, S. The glyoxysomal protease LON2 is involved in fruiting-body development, ascosporeogenesis and stress resistance in *Sordaria macrospora*. *Journal of Fungi* **2021**, *7*, 82.
7. Dahlmann, T.A.; Terfehr, D.; Becker, K.; Teichert, I. Golden Gate vectors for efficient gene fusion and gene deletion in diverse filamentous fungi. *Current genetics* **2021**, *67*, 317-330.
8. Shibayama, M.; Ooi, K.; Johnson, R.; Scott, B.; Itoh, Y. Suppression of tandem-multimer formation during genetic transformation of the mycotoxin-producing fungus *Penicillium paxilli* by disrupting an orthologue of *Aspergillus nidulans* *uvsC*. *Current genetics* **2002**, *42*, 59-65.
